# Supplementary material for: Exome Sequencing Identifies Potentially Druggable Mutations in Nasopharyngeal Carcinoma
Source: PubMed Central journal article supplement (PMC5335658; doi:10.1038/srep42980), 2017-03-03
Supplement: srep42980-s1.pdf [file srep42980-s1.pdf]

**Title:** Exome Sequencing Identifies Potentially Druggable Mutations in Nasopharyngeal Carcinoma

**Authors:** Yock Ping Chow<sup>1\*</sup>, Lu Ping Tan<sup>2\*</sup>, San Jiun Chai<sup>1</sup>, Norazlin Abdul Aziz<sup>2</sup>, Siew Woh Choo<sup>3</sup>, Paul Vey Hong Lim<sup>4</sup>, Rajadurai Pathmanathan<sup>5</sup>, Noor Kaslina Mohd Kornain<sup>6</sup>, Chee Lun Lum<sup>7</sup>, Kin Choo Pua<sup>8</sup>, Yoke Yeow Yap<sup>9</sup>, Tee Yong Tan<sup>10</sup>, Soo Hwang Teo<sup>1</sup>, Alan Soo-Beng Khoo<sup>2</sup> and Vyomesh Patel<sup>1\*\*</sup>

**Supplemental Figure legends:**

Supplemental Figure 1. Correlation between NPC tumor stages and the frequencies of mutations detected in the 4 enriched druggable pathways.

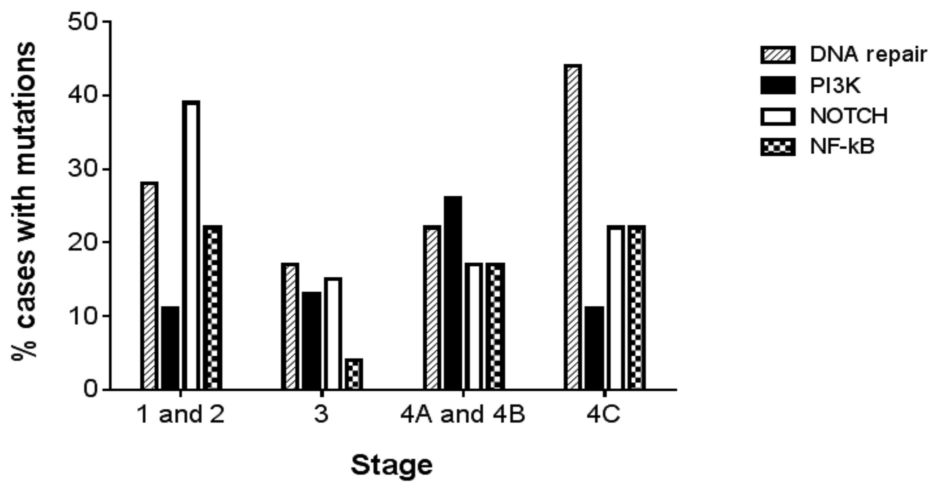

| Stage     | Number of Cases (Percentage) |            |            |            |            |
|-----------|------------------------------|------------|------------|------------|------------|
|           | Total (n=98)                 | DNA repair | PI3K       | NOTCH      | NF-κB      |
| 1 and 2   | 18                           | 5/18 (28%) | 2/18 (11%) | 7/18 (39%) | 4/18 (22%) |
| 3         | 48                           | 8/48 (17%) | 6/48 (13%) | 7/48 (15%) | 2/48 (4%)  |
| 4A and 4B | 23                           | 5/23 (22%) | 6/23 (26%) | 4/23 (17%) | 4/23 (17%) |
| 4C        | 9                            | 4/9 (44%)  | 1/9 (11%)  | 2/9 (22%)  | 2/9 (22%)  |
